# Supplementary material for: Mg12O12 and Be12O12 Nanocages as Sorbents and Sensors for H2S and SO2 Gases: A Theoretical Approach
Source: MDPI journal article supplement (doi:10.3390/nano12101757), 2022-05-21

## Supplementary Materials

# Mg<sub>12</sub>O<sub>12</sub> and Be<sub>12</sub>O<sub>12</sub> Nanocages as Sorbents and Sensors for H<sub>2</sub>S and SO<sub>2</sub> Gases: A Theoretical Approach

H. M. Badran <sup>1</sup>, Kh. M. Eid <sup>2,3</sup>, Sotirios Baskoutas <sup>4</sup> and H. Y. Ammar <sup>1,\*</sup>

<sup>1</sup> Physics Department, College of Science and Arts, Najran University, Najran 11001, Saudi Arabia; hmbadran@nu.edu.sa

<sup>2</sup> Physics Department, Faculty of Education, Ain Shams University, Cairo 11566, Egypt; khmeid@yahoo.com

<sup>3</sup> Department of Physics, College of Science and Arts, Qassim University, Albukayriyah 52725, Saudi Arabia

<sup>4</sup> Department of Materials Science, University of Patras, Patras 26504, Greece; bask@upatras.gr

\* Correspondence: hyammar@hotmail.com

**Table S1.** The examined orientations for H<sub>2</sub>S interaction with Be<sub>12</sub>O<sub>12</sub>.

| mode | Input structure                                                                     | Optimized structure                                                                 | mode | Input structure                                                                      | Optimized structure                                                                   |
|------|-------------------------------------------------------------------------------------|-------------------------------------------------------------------------------------|------|--------------------------------------------------------------------------------------|---------------------------------------------------------------------------------------|
| 1    | 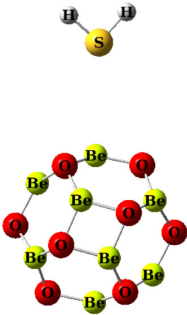 |  | 5    |  |  |
|      | $E_{ads} = -0.31 \text{ eV}$                                                        |                                                                                     |      | $E_{ads} = -0.30 \text{ eV}$                                                         |                                                                                       |
| 2    |  |  | 6    |  |  |
|      | $E_{ads} = -0.08 \text{ eV}$                                                        |                                                                                     |      | $E_{ads} = -0.09 \text{ eV}$                                                         |                                                                                       |

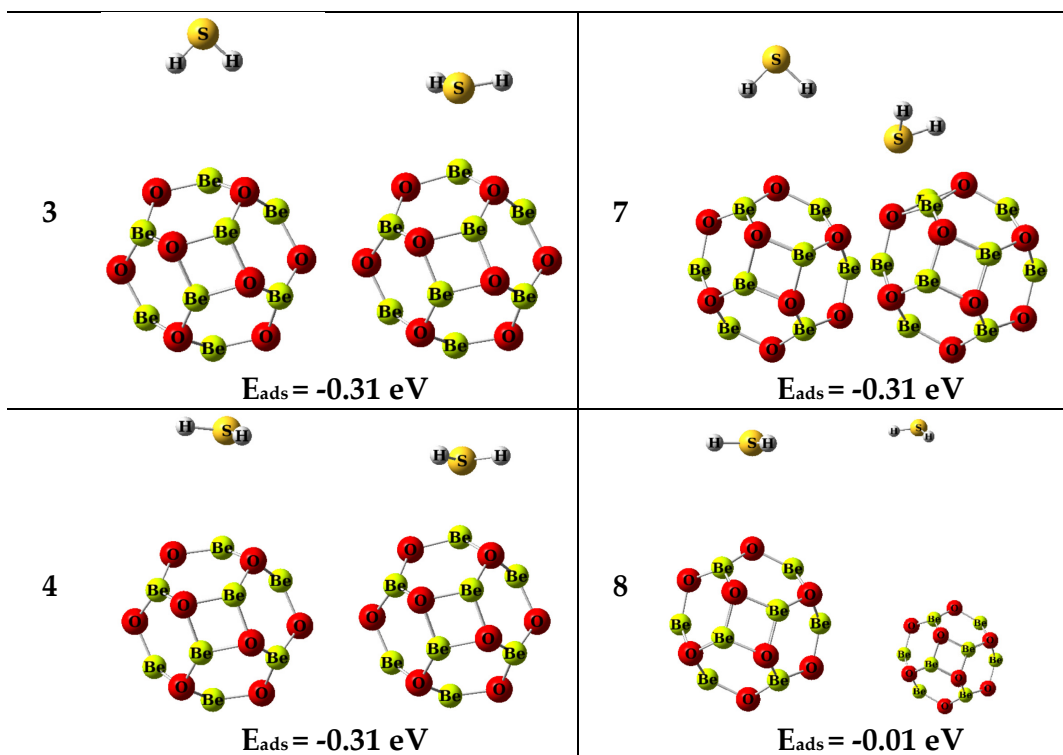

**Table S2.** The examined orientations for H<sub>2</sub>S interaction with Mg<sub>12</sub>O<sub>12</sub>.

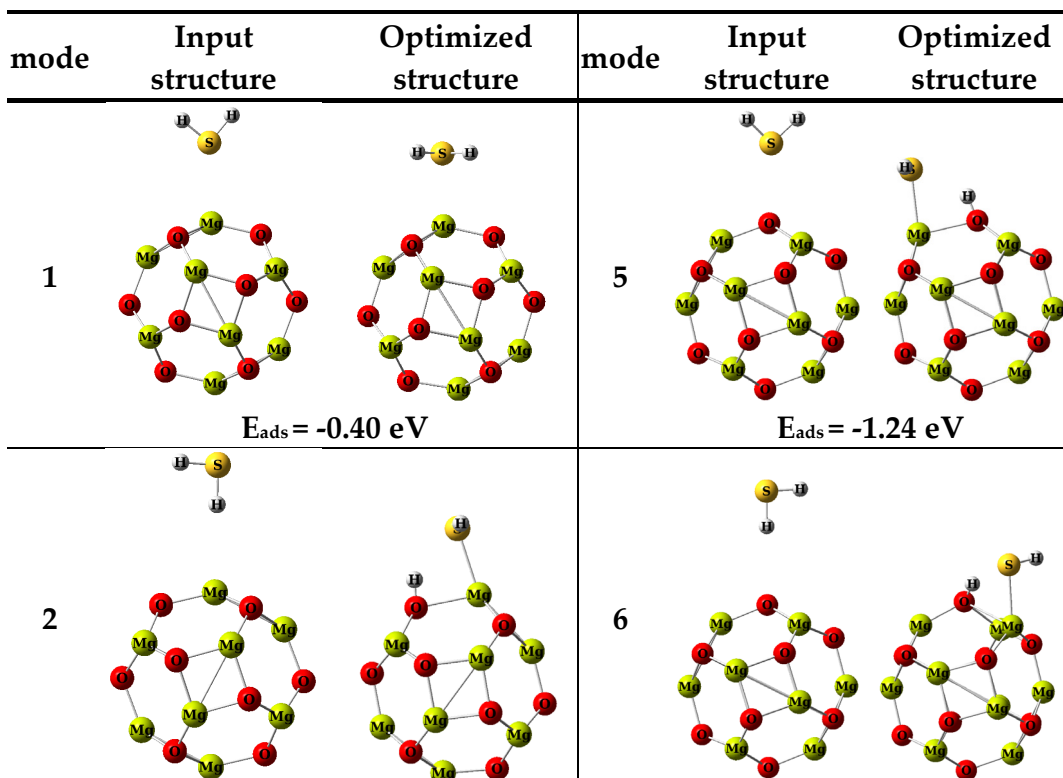

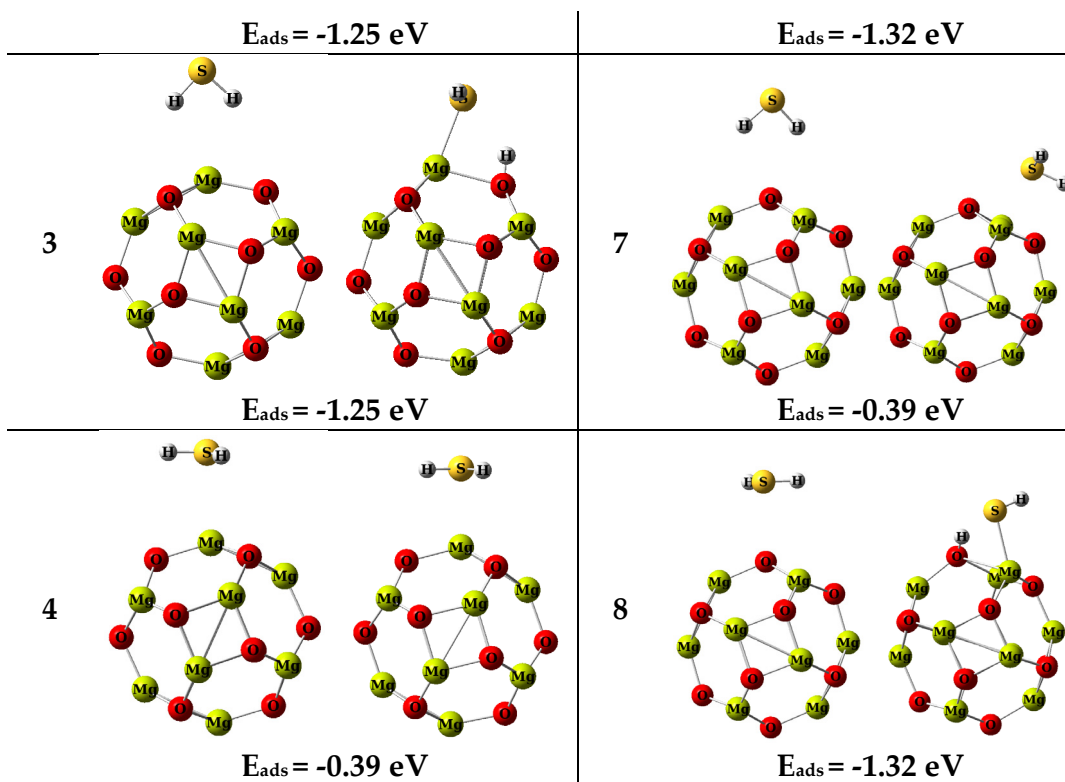

**Table S3.** The examined orientations for  $\text{SO}_2$  interaction with  $\text{Be}_{12}\text{O}_{12}$ .

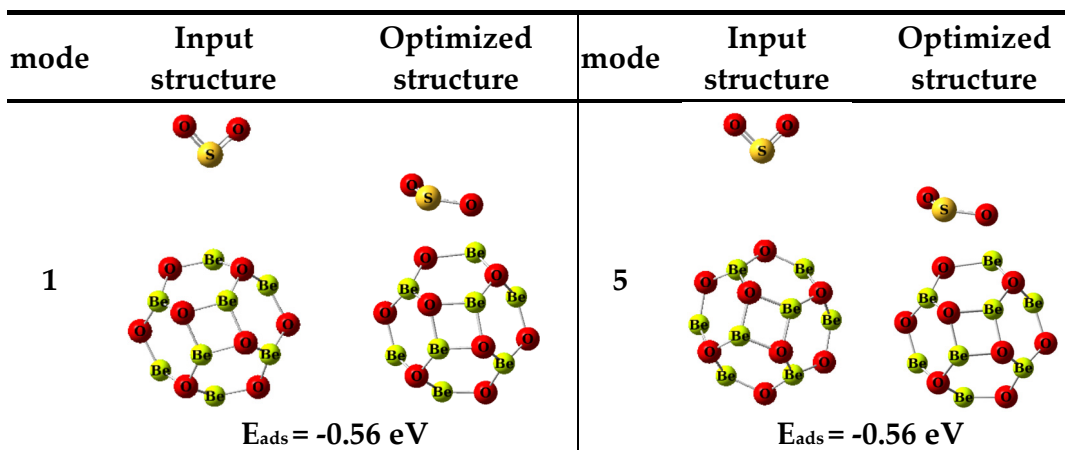

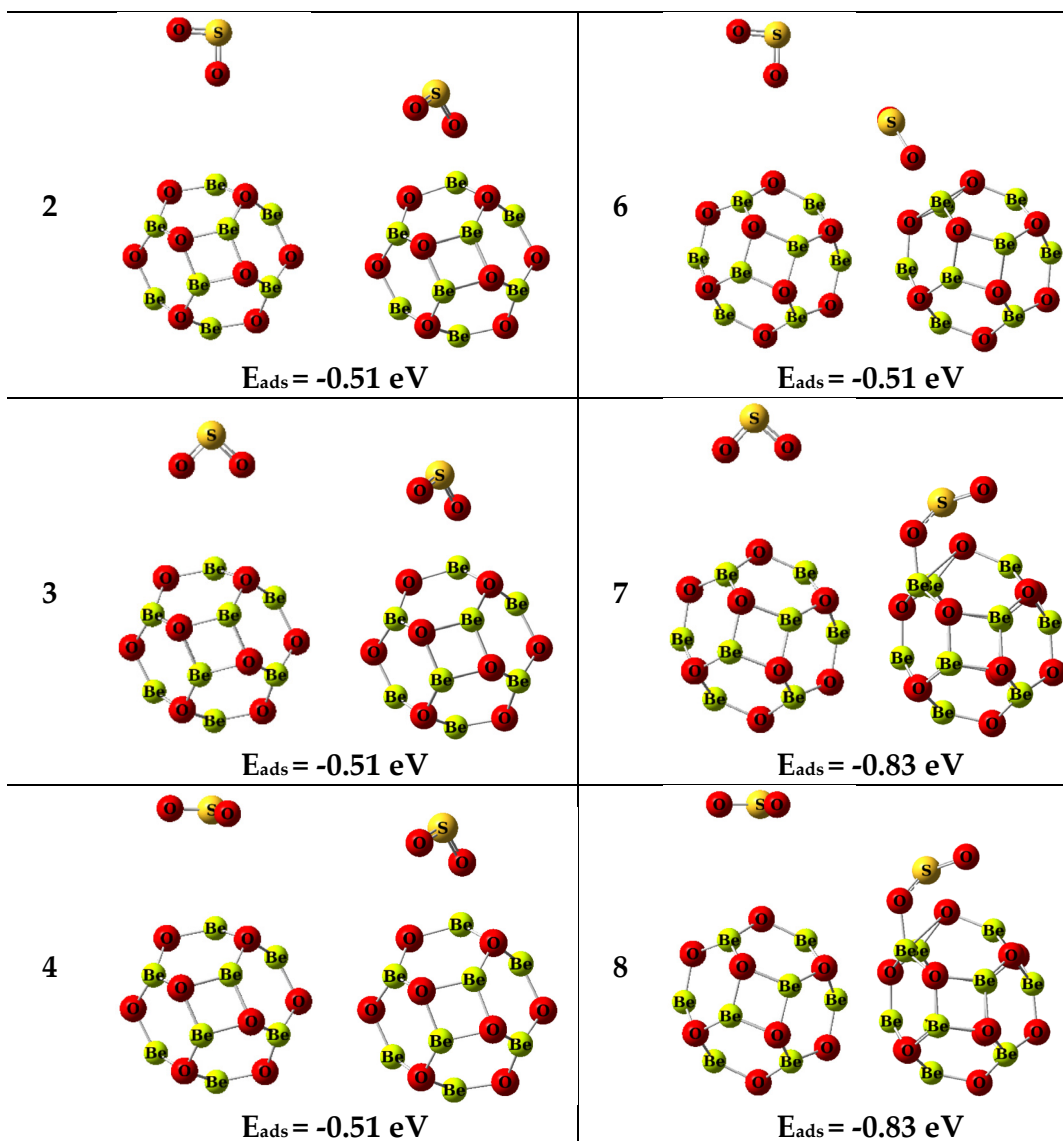

**Table S4.** The examined orientations for  $\text{SO}_2$  interaction with  $\text{Mg}_{12}\text{O}_{12}$ .

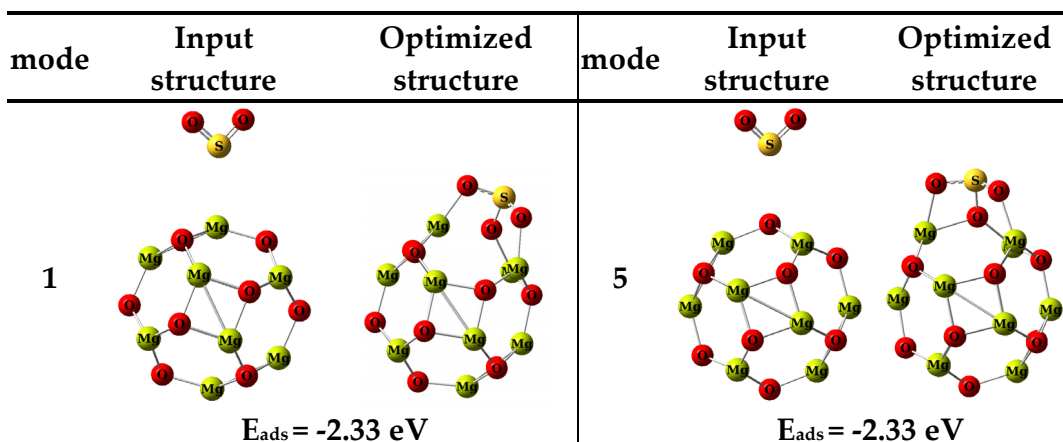

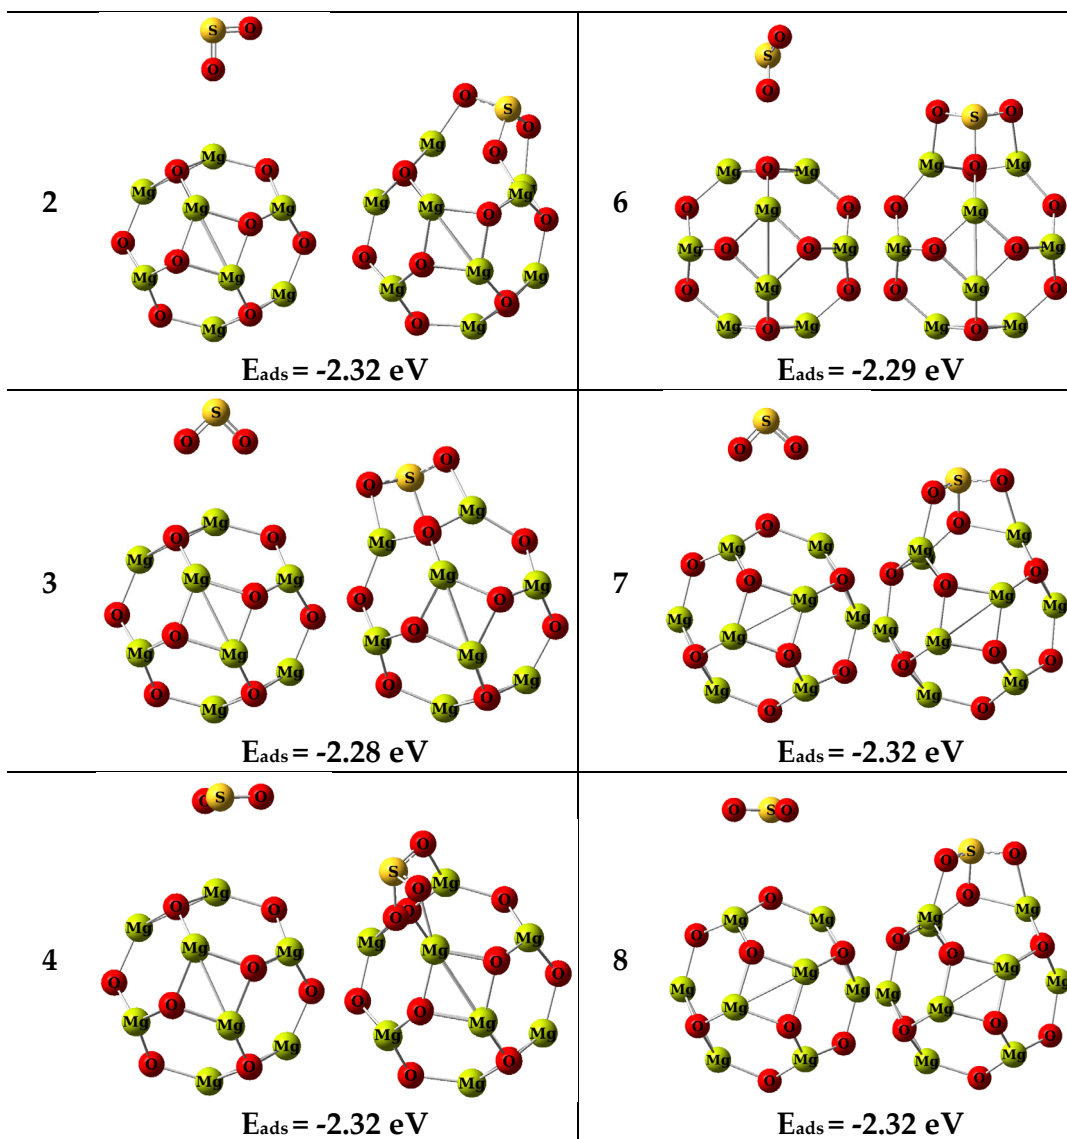

Supplement: s1 [file s1]
